# Supplementary material
Source: MDPI journal article supplement (https://www.mdpi.com/2071-1050/14/21/13852)
Supplement: s1 [file s1]

## Supplementary Material

**Table S1.** Proximate Composition of common edible insects reported in literature (% dwb).

| Insect species                               | Moisture (%) | Protein (%) | Fat (%) | Ash (%) |
|----------------------------------------------|--------------|-------------|---------|---------|
| <i>T. molitor</i> (L.) <sup>1</sup>          | 62.9         | 51.9        | 31.1    | 4.3     |
| <i>T. molitor</i> (L.) <sup>2</sup>          | 61.0         | 47.2        | 43.1    | 3.1     |
| <i>T. molitor</i> (L.) <sup>2</sup>          | 61.9         | 49.1        | 35.2    | 2.4     |
| <i>T. molitor</i> (L.) <sup>3</sup>          | 64.8         | 49.4        | 38.1    | 2.8     |
| <i>T. molitor</i> (L.) <sup>4</sup>          | -            | 47.7        | 37.7    | 3.0     |
| Average <i>T. molitor</i> (L.)               | 62.7         | 49.1        | 37.0    | 3.1     |
| <i>T. molitor</i> (A.) <sup>2</sup>          | 63.7         | 65.3        | 14.9    | 3.3     |
| <i>T. molitor</i> (A.) <sup>4</sup>          | -            | 60.2        | 20.8    | 2.7     |
| Average <i>T. molitor</i> (A.)               | 63.7         | 62.8        | 17.9    | 3.0     |
| <i>A. domesticus</i> (A.) <sup>5</sup>       | 67.7         | 47.1        | 25.8    | 3.8     |
| <i>A. domesticus</i> (A.) <sup>1</sup>       | 73.2         | 64.4        | 22.8    | 5.1     |
| <i>A. domesticus</i> (A.) <sup>2</sup>       | 69.2         | 66.6        | 22.1    | 3.6     |
| <i>A. domesticus</i> (A.) <sup>3</sup>       | 68.2         | 70.8        | 18.6    | 5.0     |
| Average <i>A. domesticus</i> (A.)            | 69.6         | 62.2        | 22.3    | 4.4     |
| BSFL (on middling diet) <sup>6</sup>         | 69.8         | 37.2        | 30.8    | 13.5    |
| BSFL (on barley diet) <sup>7</sup>           | -            | 49.1        | 33.2    | 8.3     |
| BSFL (on malted barley diet) <sup>7</sup>    | -            | 52.4        | 21.1    | 9.7     |
| BSFL (on malted corn diet) <sup>7</sup>      | -            | 53.3        | 25.5    | 10.0    |
| BSFL (on sorghum & barley diet) <sup>7</sup> | -            | 52.9        | 29.7    | 10.6    |
| BSFL (fed on chicken manure) <sup>8</sup>    | -            | 53.9        | 30.1    | 9.3     |
| BSFL (fed on kitchen waste) <sup>8</sup>     | -            | 43.3        | 34.3    | 9.6     |
| BSFL (fed on spent grain) <sup>8</sup>       | -            | 54.3        | 31.0    | 11.6    |
| Average BSFL                                 | 69.8         | 49.6        | 29.5    | 10.3    |

L. = larvae; A. = adult; BSFL = black soldier fly larvae=*H. illucenes*; Sources:<sup>27</sup> Barker et al., 1998; <sup>74</sup> Finke, 2002; <sup>24</sup> Finke, 2007; <sup>75</sup> Ramos-Elorduy et al., 2002; <sup>76</sup> Ayieko et al., 2016; <sup>23</sup> Tschirner and Simon, 2015; <sup>2</sup> Chia et al., 2020; <sup>77</sup> Shumo et al., 2019

**Table S2.** Mineral Composition of common edible insects reported in literature (mg/kg, dwb).

| Insect species                            | Ca     | K      | P      | Mg    | Na    | Fe   | Mn   | Cu   | Zn  |
|-------------------------------------------|--------|--------|--------|-------|-------|------|------|------|-----|
| <i>T. molitor</i> (L.) <sup>1</sup>       | 1,200  | -      | 14,200 | 2,800 | -     | 39.7 | 6.8  | 17.8 | 131 |
| <i>T. molitor</i> (L.) <sup>2</sup>       | 472.0  | 7,615  | 6,974  | 2,215 | 1,254 | 55.1 | 9.2  | 16.4 | 114 |
| <i>T. molitor</i> (L.) <sup>2</sup>       | 444    | 8,950  | 7,480  | 2,102 | 1,409 | 54.1 | 13.7 | 16.0 | 137 |
| Average <i>T. molitor</i> (L.)            | 705    | 8,283  | 9,551  | 2,372 | 1,332 | 49.6 | 9.9  | 16.7 | 127 |
| <i>T. molitor</i> (A.) <sup>2</sup>       | 636    | 9,366  | 7,630  | 1,669 | 1,741 | 60.1 | 11.0 | 20.7 | 127 |
| Average <i>T. molitor</i> (A.)            | 636    | 9,366  | 7,630  | 1,669 | 1,741 | 60.1 | 11.0 | 20.7 | 127 |
| <i>A. domesticus</i> (A.) <sup>3</sup>    | 3,147  | 9,798  | 331    | -     | 8,502 | 51.8 | 58.7 | 29.4 | -   |
| <i>A. domesticus</i> (A.) <sup>1</sup>    | 2,100  | -      | 7,800  | 800   | -     | 112  | 29.7 | 8.5  | 186 |
| <i>A. domesticus</i> (A.) <sup>2</sup>    | 1,321  | 11,266 | 9,578  | 1,094 | 4,351 | 62.7 | 37.3 | 20.1 | 218 |
| Average <i>A. domesticus</i> (A.)         | 2,189  | 10,532 | 5,903  | 947   | 6,427 | 75.6 | 41.9 | 19.3 | 202 |
| BSFL (on middling diet) <sup>4</sup>      | 39,350 | 12,190 | 8,910  | 3,590 | 910.0 | 630  | 730  | 34.3 | 270 |
| BSFL (on barley diet) <sup>5</sup>        | 20,730 | 8,200  | 10,530 | 3,070 | 1,180 | 240  | 250  | 16.0 | 190 |
| BSFL (on malted barley diet) <sup>5</sup> | 24,200 | 9,770  | 11,730 | 3,400 | 1,320 | 210  | 220  | 15.0 | 171 |
| BSFL (on malted corn diet) <sup>5</sup>   | 23,730 | 9,530  | 11,700 | 3,400 | 1,250 | 200  | 210  | 14.0 | 200 |

|                                              |        |       |        |       |       |       |       |      |     |
|----------------------------------------------|--------|-------|--------|-------|-------|-------|-------|------|-----|
| BSFL (on sorghum & barley diet) <sup>5</sup> | 28,070 | 9,800 | 12,370 | 3,480 | 1,180 | 250   | 260   | 11.0 | 130 |
| BSFL (fed on chicken manure) <sup>6</sup>    | 3,200  | 4,900 | 3,900  | 4,000 | 2,400 | 600   | 1,400 | 400  | 300 |
| BSFL (fed on kitchen waste) <sup>6</sup>     | 2,000  | 5,700 | 4,100  | 3,300 | 2,000 | 2,200 | 900   | 200  | 300 |
| BSFL (fed on spent grain) <sup>6</sup>       | 1,700  | 4,400 | 4,600  | 3,500 | 2,600 | 300   | 1,100 | 500  | 300 |
| Average BSFL                                 | 17,873 | 8,061 | 8,480  | 3,468 | 1,605 | 579   | 634   | 149  | 233 |

L. = larvae; A. = adult; BSFL = black soldier fly larvae=*H. illucenes*; Sources: <sup>27</sup>Barker et al., 1998; <sup>74</sup>Finke, 2002; <sup>76</sup>Ayieko et al., 2016; <sup>23</sup>Tschirner and Simon, 2015; <sup>2</sup>Chia et al., 2020; <sup>77</sup>Shumo et al., 2019
